# Supplementary material
Source: Springer Nature journal article supplement (https://www.springermedizin.de/resource/supplementary/12974_2011_450_MOESM5_ESM.pdf/9601330)

**a)**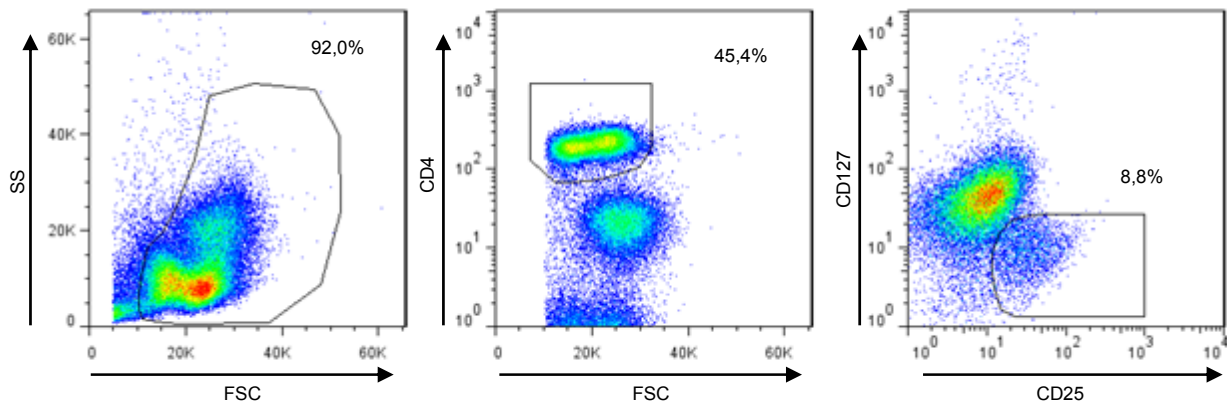**b)**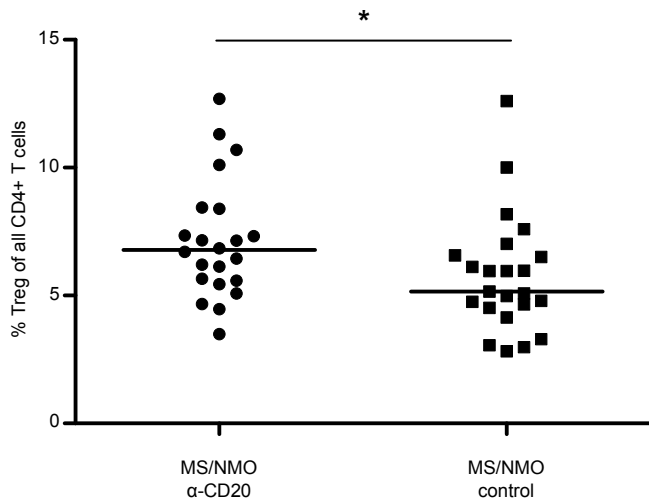

Supplement: MOESM5 [file 9601330]
